# Supplementary material
Source: PubMed Central journal article supplement (PMC10793643)
Supplement: NIHMS1954279-supplement-Supplementary_Table_1.pdf [file NIHMS1954279-supplement-Supplementary_Table_1.pdf]

Supplementary table 1. Characteristics of high resolution HLA-typed patients (n=78)

|                                    | rs6906846      |               |                  | p  | rs2254556       |                 |                  | p  |
|------------------------------------|----------------|---------------|------------------|----|-----------------|-----------------|------------------|----|
|                                    | AA<br>24       | AG<br>25      | GG<br>29         |    | TT<br>n=4       | TC<br>n=20      | CC<br>n=54       |    |
| Male, n (%)                        | 16 (67)        | 14 (56)       | 19 (66)          | NS | 3 (75)          | 11 (55)         | 35 (65)          | NS |
| Age, years (IQR)                   | 1.9 (0.8-3.8)  | 3.1 (1.5-4.7) | 2.4 (1.1-3.8)    | NS | 2.3 (0.9-3.7)   | 3.0 (1.5-4.0)   | 2.8 (1.4-4.3)    | NS |
| Illness Day <sup>a</sup> , (range) | 6 (3-8)        | 7 (3-12)      | 6 (3-10)         | NS | 7.5 (4-7)       | 6 (3-12)        | 7 (3-11)         | NS |
| Ethnicity                          |                |               |                  |    |                 |                 |                  |    |
| Asian                              | 6 (25)         | 4 (16)        | 6 (21)           |    | 0 ( 0)          | 2 (10)          | 14 (26)          |    |
| African American                   | 0 ( 0)         | 1 ( 4)        | 0 ( 0)           |    | 1 (25)          | 0 ( 0)          | 0 ( 0)           |    |
| Caucasian                          | 4 (17)         | 12 (48)       | 10 (34)          | NS | 2 (50)          | 8 (40)          | 16 (30)          | NS |
| Hispanic                           | 7 (29)         | 6 (24)        | 9 (31)           |    | 0 ( 0)          | 6 (30)          | 16 (30)          |    |
| More than 2 races                  | 7 (29)         | 2 ( 8)        | 4 (14)           |    | 1 (25)          | 4 (20)          | 8 (14)           |    |
| Other                              | 0 ( 0)         | 0 ( 0)        | 0 ( 0)           |    | 0 ( 0)          | 0 ( 0)          | 0 ( 0)           |    |
| CA status                          |                |               |                  |    |                 |                 |                  |    |
| Normal                             | 13 (54)        | 20 (80)       | 20 (69)          | NS | 3 (75)          | 17 (85)         | 26 (48)          | NS |
| Dilated                            | 5 (21)         | 2 ( 8)        | 2 ( 7)           |    | 0 ( 0)          | 3 (15)          | 12 (22)          |    |
| Aneurysm                           | 6 (25)         | 3 (12)        | 3 (10)           |    | 1 (25)          | 0 ( 0)          | 16 (30)          |    |
| Z-worst, median (range)            | 2.3 (1.3-3.9)  | 1.2 (0.8-2.0) | 1.2 (0.8-2.0)    |    | 2.0 (1.8-6.9)   | 2.1 (1.2-3.0)   | 2.8 (1.5-4.3)    | NS |
| IVIG resistant                     | 7 (29)         | 13 (52)       | 16 (55)          | NS | 1 (25)          | 3 (15)          | 10 (18)          | NS |
| Laboratory data, median (IQR)      |                |               |                  |    |                 |                 |                  |    |
| WBC $\times 10^3/\text{mm}^3$      | 16 (12-19)     | 12 (9.5-14.9) | 13.6 (10.3-19.3) | NS | 10.7 (7.9-14.5) | 14.1 (9.8-18.8) | 13.6 (11.1-18.6) | NS |
| ESR, mm/h                          | 66 (49-79)     | 48 (34-66.5)  | 67 (37-93)       | NS | 50 (44-61)      | 51 (31-68)      | 61 (45-84)       | NS |
| CRP, mg/dl                         | 7.8 (4.7-18.1) | 7 (2.7-15)    | 8.3 (4.6-15.2)   | NS | 6.0 (4.3-7.3)   | 4.7 (2.5-68.3)  | 8.2 (5-16.4)     | NS |

p-values were calculated by Mann–Whitney U test for continuous variables and chi square test for categorical variables. <sup>a</sup>: Illness day 1: first calendar day of fever. IQR: interquartile range, IVIG: Intravenous immunoglobulin, CRP: C-reactive protein, ESR: Erythrocyte sedimentation rate, WBC: White blood cell count, NS: not significant
