# Supplementary material
Source: PubMed Central journal article supplement (PMC10793643)
Supplement: NIHMS1954279-supplement-Supplementary_Table_2.pdf [file NIHMS1954279-supplement-Supplementary_Table_2.pdf]

Supplementary Table 2. Association between rs6906846 and HLA-C type

| HLA-C type | US multi-ethnicity (Cohort 1) |          |         | Japanese (Cohort 2)    |          |         | Combined<br>$P_{combined}$ |
|------------|-------------------------------|----------|---------|------------------------|----------|---------|----------------------------|
|            | rs6906846 <sup>a</sup>        |          | p       | rs6906846 <sup>a</sup> |          | p       |                            |
|            | A allele                      | G allele |         | A allele               | G allele |         |                            |
|            | n=48                          | n=58     |         | n=46                   | n=250    |         |                            |
| *07:02     | 23                            | 0        | 2.8E-10 | 20                     | 1        | 1.9E-17 | 2.8E-30                    |
| *04:01     | 20                            | 0        | 8.6E-09 | 5                      | 0        | 7.5E-05 | 1.1E-17                    |
| *12:02     | 0                             | 0        | NA      | 21                     | 1        | 1.9E-18 | 1.5E-13                    |
| *04:03     | 2                             | 0        | NS      | 0                      | 0        | NA      | NS                         |
| *02:02     | 1                             | 0        | NS      | 0                      | 0        | NA      | NS                         |
| *04:17     | 1                             | 0        | NS      | 0                      | 0        | NA      | NS                         |
| *07:01     | 1                             | 5        | NS      | 0                      | 0        | NA      | NS                         |
| *01:02     | 0                             | 13       | 2.1E-04 | 0                      | 78       | 2.5E-07 | 8.7E-13                    |
| *06:02     | 0                             | 8        | NS      | 0                      | 2        | NS      | NS                         |
| *03:04     | 0                             | 7        | NS      | 0                      | 33       | NS      | 1.7E-05                    |
| *03:03     | 0                             | 6        | NS      | 0                      | 46       | 2.8E-04 | 5.8E-07                    |
| *08:01     | 0                             | 4        | NS      | 0                      | 28       | NS      | 2.7E-04                    |
| *05:01     | 0                             | 3        | NS      | 0                      | 1        | NS      | NS                         |
| *12:03     | 0                             | 2        | NS      | 0                      | 0        | NA      | NS                         |
| *15:02     | 0                             | 2        | NS      | 0                      | 12       | NS      | NS                         |
| *03:02     | 0                             | 1        | NS      | 0                      | 2        | NS      | NS                         |
| *03:05     | 0                             | 1        | NS      | 0                      | 0        | NA      | NS                         |
| *07:04     | 0                             | 1        | NS      | 0                      | 2        | NS      | NS                         |
| *14:02     | 0                             | 1        | NS      | 0                      | 21       | NS      | NS                         |
| *15:09     | 0                             | 1        | NS      | 0                      | 0        | NA      | NS                         |
| *16:01     | 0                             | 1        | NS      | 0                      | 0        | NA      | NS                         |
| *16:02     | 0                             | 1        | NS      | 0                      | 0        | NA      | NS                         |
| *17:01     | 0                             | 1        | NS      | 0                      | 0        | NA      | NS                         |
| *14:03     | 0                             | 0        | NA      | 0                      | 16       | NS      | NS                         |
| *08:03     | 0                             | 0        | NA      | 0                      | 6        | NS      | NS                         |
| *01:03     | 0                             | 0        | NA      | 0                      | 1        | NS      | NS                         |

p: nominal p-value, Bonferroni corrected p value threshold: 0.05/(50 HLA-B types + 26 HLA-C types)=6.6E-04, NS: not significant, NA: not applicable, <sup>a</sup>: Only homozygous subjects were included in the analysis.
